# Supplementary material for: The Relationship betweenTP53Gene Status and Carboxylesterase 2 Expression in Human Colorectal Cancer
Source: Hindawi journal article supplement (doi:10.1155/2018/5280736), 2018-01-01
Supplement: f1 [file 5280736.f1.pdf]

Table S1. PCR primers used for *TP53* sequencing.

| Target    | Forward                  | Reverse                | Reference                           |
|-----------|--------------------------|------------------------|-------------------------------------|
| Exon 1    | CACAGCTCTGGCTTGCAGA      | AGCGATTTTCCCGAGCTGA    | Liu & Bodmer <sup>1</sup>           |
| Exon 2    | AGCTGTCTCAGACACTGGCA     | GAGCAGAAAGTCAGTCCCATG  | Liu & Bodmer <sup>1</sup>           |
| Exons 3-4 | AGACCTATGGAAACTGTGAGTGGA | GAAGCCTAAGGGTGAAGAGGA  | Liu & Bodmer <sup>1</sup>           |
| Exons 5-6 | CGCTAGTGGGTTGCAGGA       | CACTGACAACCACCCTTAAC   | Liu & Bodmer <sup>1</sup>           |
| Exon 7    | CTGCTTGCCACAGGTCTC       | TGGATGGGTAGTAGTATGGAAG | Liu & Bodmer <sup>1</sup>           |
| Exons 8-9 | GTTGGGAGTAGATGGAGCCT     | GGCATTGAGTGTTAGACTG    | Liu & Bodmer <sup>1</sup>           |
| Exon 10   | GGTACTTGAAGTGCAGTTTCT    | CAGCTGCCTTTGACCATGAA   | Verselis <i>et al.</i> <sup>2</sup> |
| Exon 11   | TCCCGTTGTCCCAGCCTT       | TAACCCTTAACTGCAAGAACAT | Liu & Bodmer <sup>1</sup>           |

1. Liu Y, Bodmer WF. Analysis of P53 mutations and their expression in 56 colorectal cancer cell lines. *Proc Natl Acad Sci U S A*. 103: 976-981 (2006).
2. Verselis SJ, Rheinwald JG, Fraumeni JF Jr, Li FP. Novel p53 splice site mutations in three families with Li-Fraumeni syndrome. *Oncogene*. 19: 4230-4235 (2000).

Table S2: Colorectal cancer specimens analysed in this study

| Patient No. | Age | Sex | Lesion Site                            | Histologic Type | Stage | T  | N | M              | Preoperative Chemotherapy | CES2/18S rRNA(ratio to Normal tissue) | TP53 genotype     | TP53 Functionality                                                    |
|-------------|-----|-----|----------------------------------------|-----------------|-------|----|---|----------------|---------------------------|---------------------------------------|-------------------|-----------------------------------------------------------------------|
| 1           | 78  | F   | sigmoid colon                          | tub2>tub1       | 2     | 3  | 0 | 0              |                           | 0.305660069                           | P72R,H179Y        | partially functional(H179Y)                                           |
| 2           | 69  | M   | rectum                                 | tub1,2>pap>muc  | 3a    | 3  | 1 | 0              |                           | 0.035158078                           |                   |                                                                       |
| 3           | 76  | F   | ascending colon                        | pap/tub         | 1     | 2  | 0 | 0              |                           | 0.050765775                           | P72R              |                                                                       |
| 4           | 55  | M   | rectum                                 | tub2>muc        | 2     | 3  | 0 | 0              |                           | 0.138696184                           | P72R              |                                                                       |
| 5           | 76  | F   | rectum                                 | tub1>tub2       | 2     | 3  | 0 | 0              |                           | 0.024013675                           | P72R,R175H        | non-functional(R175H)                                                 |
| 6           | 77  | M   | sigmoid colon                          | tub2>tub1       | 3a    | 3  | 1 | 0              |                           | 0.005758864                           | P72R,R175H        | non-functional(R175H)                                                 |
| 7           | 66  | F   | ascending colon                        | tub2>muc        | 2     | 3  | 0 | 0              |                           | 0.102237757                           | P72R              |                                                                       |
| 8           | 63  | M   | rectum                                 | tub2>tub1>por   | 2     | 3  | 0 | 0              |                           | 0.726986259                           | P72R,C141Y        | non-functional(C141Y)                                                 |
| 9           | 66  | M   | sigmoid colon                          | tub2>tub1>por   | 2     | 3  | 0 | 0              |                           | 0.607097442                           | P72R,L145P        | non-functional(L145P)                                                 |
| 10          | 65  | M   | ascending colon                        | tub2            | 2     | 3  | 0 | 0              |                           | 0.246558176                           | P72R              |                                                                       |
| 11          | 78  | M   | transverse colon                       | tub2>tub1       | 3a    | 3  | 1 | 0              |                           | 0.986232704                           | R282W             | non-functional(R282W)                                                 |
| 12          | 64  | F   | rectum                                 | tub2>tub1>por   | 2     | 4  | 0 | 0              |                           | 0.071297732                           | P72R,C135F        | non-functional(C135F)                                                 |
| 13          | 84  | F   | sigmoid colon                          | tub1>tub2       | 1     | 2  | 0 | 0              |                           | 0.079109787                           | P72R              |                                                                       |
| 14          | 64  | M   | rectum                                 | tub2>tub1>muc   | 4     | 2  | 0 | 1(left lung)   |                           | 4.658934346                           | R273H             | non-functional(R273H)                                                 |
| 15          | 53  | M   | ascending colon                        | tub2>muc        | 2     | 3  | 0 | 0              |                           | 0.267943366                           | D49H,P72R         | non-functional(D49H)                                                  |
| 16          | 68  | F   | transverse colon                       | tub2>muc        | 4     | 3  | 1 | 1(p)           |                           | 0.277392368                           | P72R,R273C        | non-functional(R273C)                                                 |
| 17          | 60  | M   | rectum                                 | tub2>por        | 3a    | 4b | 1 | 0              |                           | 0.087171479                           | P72R,R282W        | non-functional(R282W)                                                 |
| 18          | 67  | F   | sigmoid colon                          | tub2>tub1>por   | 3a    | 3  | 1 | 0              |                           | 0.243163737                           | P72R              |                                                                       |
| 19          | 67  | M   | sigmoid colon                          | por>tub2        | 3b    | 4b | 2 | 0              |                           | 2.173469725                           | P72R,T211I        | partially functional(T211I)                                           |
| 20          | 76  | M   | sigmoid colon, metastatic liver cancer | tub2>muc        | 4     | 3  | 0 | 1a(H1)         |                           | 0.901250463                           | P72R              |                                                                       |
| 21          | 42  | M   | rectum(Ra)                             | por>tub2>muc    | 3b    | 3  | 1 | 0              |                           | 1.094293701                           | P72R              |                                                                       |
| 22          | 45  | F   | rectum                                 | por>tub, pap    | 3a    | 3  | 1 | 0              | FOLFOX                    | 0.258816231                           | P72R              |                                                                       |
| 23          | 71  | F   | rectum                                 | tub2            | 2     | 3  | 0 | 0              |                           | 0.312082637                           | P72R,R249W        | non-functional(R249W)                                                 |
| 24          | 68  | M   | rectum                                 | tub2            | 2     | 3  | 0 | 0              |                           | 0.063372467                           | P72R              |                                                                       |
| 25          | 51  | F   | rectum                                 | tub1>tub2       | 2     | 3  | 0 | 0              |                           | 0.503477775                           | P72R,C275F        | non-functional(C275F)                                                 |
| 26          | 65  | F   | rectum                                 | tub2>tub1>por   | 4     | 3  | 1 | 0              |                           | 1.569168196                           | E11Q,P72R         |                                                                       |
| 27          | 62  | M   | rectum(Rs)                             | tub2            | 2     | 2  | 0 | 0              | FOLFOX+BV                 | 0.005758864                           | P72R,Y236C        | non-functional(Y236C)                                                 |
| 28          | 75  | M   | sigmoid colon                          | tub2            | 4     | 3  | 3 | 1a(P)          |                           | 0.21915143                            | P72R,R273C        | non-functional(R273C)                                                 |
| 29          | 40  | M   | rectum                                 | tub2            | 3a    | 2  | 1 | 0              |                           | 0.048697786                           | P72R              |                                                                       |
| 30          | 61  | F   | sigmoid colon, rectum                  | tub2            | 3a    | 3  | 1 | 0              |                           | 0.752623374                           |                   |                                                                       |
| 31          | 81  | M   | rectum                                 | tub2>tub1       | 2     | 3  | 0 | 0              |                           | 0.128514228                           | P72R              |                                                                       |
| 32          | 80  | F   | transverse colon                       | tub2,por        | 3a    | 1b | 1 | 0              |                           | 0.071793647                           | P72R,R213Q        | non-functional(R213Q)                                                 |
| 33          | 65  | F   | transverse colon                       | tub2            | 4     | 3  | 1 | 1b(P,OTH)      |                           | 0.186856156                           | P72R,R213Q        | non-functional(R213Q)                                                 |
| 34          | 66  | F   | ascending colon                        | tub2            | 2     | 3  | 0 | 0              |                           | 1.569168196                           | R156C,Q192K,R248W | partially functional(R156C), functional(Q192K), non-functional(R248W) |
| 35          | 58  | M   | ascending colon                        | tub2>tub1>por   | 4     | 3  | 2 | 1b(H3,PUL,LYM) |                           | 0.747424624                           | P72R,C275Y        | non-functional(C275Y)                                                 |
| 36          | 70  | M   | ascending colon                        | tub2>tub1       | 1     | 2  | 0 | 0              |                           | 4.316912946                           | P72R              |                                                                       |
| 37          | 75  | M   | transverse colon                       | tub2>tub1>por   | 1     | 2  | 0 | 0              |                           | 0.044194174                           | P72R,R273C        | non-functional(R273C)                                                 |

Histologic Type tub: tubular adenocarcinoma(well differentiated type:tub1, moderately differentiated type:tub2) pap: papillary adenocarcinoma muc: mucinous adenocarcinoma por: poorly differentiated adenocarcinoma(solid type:por1, non-solid type:por2)

T: depth of tumor invasion N: lymph node metastasis M: distant metastasis

M: distant metastasis P:peritoneum H:liver OTH:other PUL:lung LYM:lymph node

Preopetative Chemotherapy FOLFOX:Infusional 5-FU+Leucovorin+Oxaliplatin BV:Bevacizumab

**Figure S1**

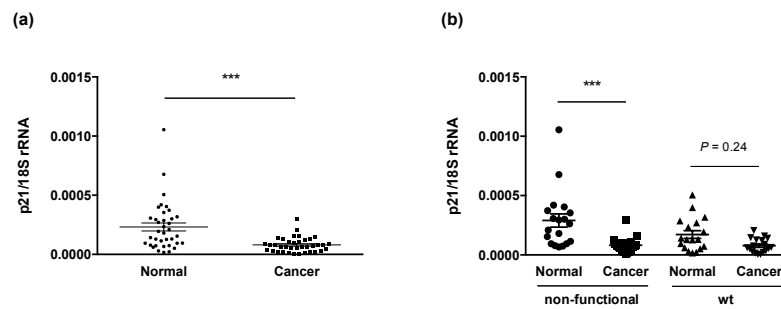

**Figure S1.** p21 expression in human colorectal cancers and adjacent normal tissues was quantified by real-time reverse transcriptase PCR. (a) p21 mRNA was significantly decreased in the tumor tissue. 18S rRNA was used as a reference gene. \*\*\*,  $P < 0.001$  by paired, two-tailed t-test. (b) The p21 expression levels were compared between tumors with *TP53* mutations generating non-functional p53 protein and tumors without *TP53* mutations. \*\*\*,  $P < 0.001$ . A Tukey-Kramer test was used.

Table S3. Correlation between p21 and CES2 expression

| <b><i>TP53</i> gene status</b> | <b>Tissue</b> | <b>Pearson's <i>r</i></b> | <b>95% CI</b>          | <b><i>P</i> value</b> |
|--------------------------------|---------------|---------------------------|------------------------|-----------------------|
| non-Functional                 | Normal tissue | 0.8901849                 | 0.7319082 – 0.9573205  | 3.319E-07             |
|                                | Cancer        | 0.7019436                 | 0.3636890 – 0.8766509  | 0.000808              |
| wt                             | Normal tissue | 0.7337255                 | 0.4058974 – 0.8942621  | 0.0005287             |
|                                | Cancer        | 0.2390073                 | -0.2564825 – 0.6350186 | 0.2390073             |
